# Supplementary material for: Environmental conditions for alternative tree-cover states in high latitudes
Source: Copernicus journal article supplement (doi:10.5194/bg-14-511-2017), 2017-02-02
Supplement: Supplementary file 1 [file Supplementary_Tables.pdf › Abis_Brovkin_Supplementary_Material_for_Discussion_09.01.2017/Supplementary_Tables.pdf]

# Supplementary Tables to “Environmental Conditions for Alternative Tree Cover States in High Latitudes”

Beniamino Abis<sup>1,2</sup> and Victor Brovkin<sup>2</sup>

<sup>1</sup>International Max Planck Research School on Earth System Modelling, Hamburg, Germany

<sup>2</sup>Max Planck Institute for Meteorology, Hamburg, Germany

**Table S1.** Correlation matrix among all the environmental variables across North America.

| Correlation matrix for Eastern North America |         |         |         |         |         |         |         |         |
|----------------------------------------------|---------|---------|---------|---------|---------|---------|---------|---------|
|                                              | MAR     | MSSM    | MTmin   | PZI     | FF      | GDD0    | PTD     | ST      |
| MAR                                          | 1.0000  | 0.8891  | 0.8253  | -0.7847 | 0.1039  | 0.6490  | 0.3097  | -0.0213 |
| MSSM                                         | 0.8891  | 1.0000  | 0.7148  | -0.6763 | 0.0503  | 0.5574  | 0.2356  | -0.0173 |
| MTmin                                        | 0.8253  | 0.7148  | 1.0000  | -0.9295 | 0.2115  | 0.9269  | 0.5796  | 0.0303  |
| PZI                                          | -0.7847 | -0.6763 | -0.9295 | 1.0000  | -0.2830 | -0.9032 | -0.5726 | -0.0009 |
| FF                                           | 0.1039  | 0.0503  | 0.2115  | -0.2830 | 1.0000  | 0.2539  | 0.3054  | 0.0610  |
| GDD0                                         | 0.6490  | 0.5574  | 0.9269  | -0.9032 | 0.2539  | 1.0000  | 0.6239  | -0.0190 |
| PTD                                          | 0.3097  | 0.2356  | 0.5796  | -0.5726 | 0.3054  | 0.6239  | 1.0000  | 0.0787  |
| ST                                           | -0.0213 | -0.0173 | 0.0303  | -0.0009 | 0.0610  | -0.0190 | 0.0787  | 1.0000  |

| Correlation matrix for Western North America |         |         |         |         |         |         |         |         |
|----------------------------------------------|---------|---------|---------|---------|---------|---------|---------|---------|
|                                              | MAR     | MSSM    | MTmin   | PZI     | FF      | GDD0    | PTD     | ST      |
| MAR                                          | 1.0000  | 0.7899  | 0.5708  | -0.5321 | -0.0081 | 0.3072  | 0.2775  | -0.1028 |
| MSSM                                         | 0.7899  | 1.0000  | 0.4975  | -0.4778 | 0.0286  | 0.2183  | 0.2208  | -0.0638 |
| MTmin                                        | 0.5708  | 0.4975  | 1.0000  | -0.8895 | 0.2362  | 0.8605  | 0.7730  | -0.1384 |
| PZI                                          | -0.5321 | -0.4778 | -0.8895 | 1.0000  | -0.2610 | -0.6850 | -0.6206 | 0.0677  |
| FF                                           | -0.0081 | 0.0286  | 0.2362  | -0.2610 | 1.0000  | 0.2557  | 0.2153  | -0.0829 |
| GDD0                                         | 0.3072  | 0.2183  | 0.8605  | -0.6850 | 0.2557  | 1.0000  | 0.8225  | -0.1951 |
| PTD                                          | 0.2775  | 0.2208  | 0.7730  | -0.6206 | 0.2153  | 0.8225  | 1.0000  | -0.2866 |
| ST                                           | -0.1028 | -0.0638 | -0.1384 | 0.0677  | -0.0829 | -0.1951 | -0.2866 | 1.0000  |

**Table S2.** Correlation matrix among all the environmental variables across North Eurasia.

| Correlation matrix for Eastern North Eurasia |         |         |         |         |         |         |         |         |
|----------------------------------------------|---------|---------|---------|---------|---------|---------|---------|---------|
|                                              | MAR     | MSSM    | MTmin   | PZI     | FF      | GDD0    | PTD     | ST      |
| MAR                                          | 1.0000  | 0.8289  | 0.5571  | -0.5170 | 0.0243  | 0.3526  | 0.0627  | -0.0238 |
| MSSM                                         | 0.8289  | 1.0000  | 0.5134  | -0.4385 | -0.1163 | 0.2293  | 0.0242  | -0.1577 |
| MTmin                                        | 0.5571  | 0.5134  | 1.0000  | -0.8917 | 0.3394  | 0.7816  | 0.3576  | -0.3114 |
| PZI                                          | -0.5170 | -0.4385 | -0.8917 | 1.0000  | -0.3712 | -0.7641 | -0.3359 | 0.3286  |
| FF                                           | 0.0243  | -0.1163 | 0.3394  | -0.3712 | 1.0000  | 0.5002  | 0.3976  | -0.1153 |
| GDD0                                         | 0.3526  | 0.2293  | 0.7816  | -0.7641 | 0.5002  | 1.0000  | 0.5128  | -0.3454 |
| PTD                                          | 0.0627  | 0.0242  | 0.3576  | -0.3359 | 0.3976  | 0.5128  | 1.0000  | -0.3295 |
| ST                                           | -0.0238 | -0.1577 | -0.3114 | 0.3286  | -0.1153 | -0.3454 | -0.3295 | 1.0000  |
| Correlation matrix for Western North Eurasia |         |         |         |         |         |         |         |         |
|                                              | MAR     | MSSM    | MTmin   | PZI     | FF      | GDD0    | PTD     | ST      |
| MAR                                          | 1.0000  | 0.8076  | 0.0038  | -0.2666 | -0.6025 | -0.2109 | -0.2476 | -0.0190 |
| MSSM                                         | 0.8076  | 1.0000  | -0.0999 | -0.0737 | -0.5793 | -0.2450 | -0.2464 | -0.0636 |
| MTmin                                        | 0.0038  | -0.0999 | 1.0000  | -0.7889 | 0.5027  | 0.9316  | 0.7961  | -0.0954 |
| PZI                                          | -0.2666 | -0.0737 | -0.7889 | 1.0000  | -0.2001 | -0.6642 | -0.4717 | 0.1565  |
| FF                                           | -0.6025 | -0.5793 | 0.5027  | -0.2001 | 1.0000  | 0.6525  | 0.6215  | -0.0617 |
| GDD0                                         | -0.2109 | -0.2450 | 0.9316  | -0.6642 | 0.6525  | 1.0000  | 0.8325  | -0.0281 |
| PTD                                          | -0.2476 | -0.2464 | 0.7961  | -0.4717 | 0.6215  | 0.8325  | 1.0000  | -0.0831 |
| ST                                           | -0.0190 | -0.0636 | -0.0954 | 0.1565  | -0.0617 | -0.0281 | -0.0831 | 1.0000  |

**Table S3.** Boundaries of the bins used in the classification.

| Eastern North America |          |             |               |          |          |          |            |
|-----------------------|----------|-------------|---------------|----------|----------|----------|------------|
|                       | 0        | 1           | 2             | 3        | 4        | 5        | 6          |
| Mtmin 1x              | -16.9697 | -6.5599     | -4.5902       | -2.6206  | -0.6509  | 1.3187   | 5.8752     |
| MSSM 6x               | 104.2174 | 238.6162    | 301.3687      | 364.1211 | 426.8735 | 489.6259 | 598.2341   |
| Mar 36x               | 120.0692 | 534.9277    | 647.2662      | 759.6046 | 871.9431 | 984.2815 | 1,607.1846 |
| PZI 216x              | 0.0000   | 0.0878      | 0.1757        | 0.6411   | 1.0000   |          |            |
| ST 1000x              | 1,2,12   | 3,4,5,6,7,8 | 9,10,11,13,14 |          |          |          |            |
| FF 3864x              | 0.0000   | 0.0714      | 0.1429        | 0.3714   | 1.8824   |          |            |
| Western North America |          |             |               |          |          |          |            |
|                       | 0        | 1           | 2             | 3        | 4        | 5        | 6          |
| Mtmin 1x              | -15.2733 | -8.9262     | -6.2897       | -3.6531  | -1.0165  | 1.6200   | 8.4559     |
| MSSM 6x               | 19.2895  | 137.0854    | 188.1259      | 239.1663 | 290.2067 | 341.2471 | 694.4776   |
| Mar 36x               | 51.8308  | 191.7554    | 284.9050      | 378.0546 | 471.2042 | 564.3538 | 3138.8692  |
| PZI 216x              | 0.0000   | 0.2012      | 0.4024        | 0.8197   | 1.0000   |          |            |
| ST 1000x              | 1,2,12   | 3,4,5,6,7,8 | 9,10,11,13,14 |          |          |          |            |
| FF 3864x              | 0.0000   | 0.2941      | 0.5882        | 0.7059   | 2.9412   |          |            |
| Eastern North Eurasia |          |             |               |          |          |          |            |
|                       | 0        | 1           | 2             | 3        | 4        | 5        | 6          |
| Mtmin 1x              | -17.9223 | -10.5526    | -8.5407       | -6.5288  | -4.5170  | -2.5051  | 3.0637     |
| MSSM 6x               | 54.3041  | 155.1053    | 199.3099      | 243.5146 | 287.7192 | 331.9239 | 573.2997   |
| Mar 36x               | 132.3769 | 331.0546    | 399.7775      | 468.5004 | 537.2233 | 605.9462 | 1006.1846  |
| PZI 216x              | 0.0000   | 0.0050      | 0.0100        | 0.9662   | 1.0000   |          |            |
| ST 1000x              | 1,2,12   | 3,4,5,6,7,8 | 9,10,11,13,14 |          |          |          |            |
| FF 3864x              | 0.0000   | 0.4118      | 0.8235        | 0.9412   | 3.5294   |          |            |
| Western North Eurasia |          |             |               |          |          |          |            |
|                       | 0        | 1           | 2             | 3        | 4        | 5        |            |
| Mtmin 1x              | -8.2882  | -4.7622     | -2.4858       | -0.2094  | 2.0669   | 5.3837   |            |
| MSSM 5x               | 99.4328  | 255.6825    | 291.2951      | 326.9077 | 362.5203 | 440.3554 |            |
| Mar 25x               | 204.7615 | 520.0138    | 567.5974      | 615.1810 | 662.7646 | 797.2000 |            |
| PZI 125x              | 0.0000   | 0.0705      | 0.1410        | 0.2774   |          |          |            |
| ST 1000x              | 1,2,12   | 3,4,5,6,7,8 | 9,10,11,13,14 |          |          |          |            |
| FF 3864x              | 0.0000   | 0.2647      | 0.5294        | 0.5882   | 3.1765   |          |            |

**Table S4.** Summary of possible alternative classes. The multipliers refer to the boundaries in Table S3. The vegetation states correspond to the sum of the multipliers. In the fire disturbed cases, the total number of gridcells is corrected to take into account overlaps with cases where the same vegetation state is also present among the states which are not fire disturbed.

| Vegetation State            |       | 3864x | 1000x | 216x | 36x | 6x | 1x | # Gridcells I | # Gridcells II | Total |
|-----------------------------|-------|-------|-------|------|-----|----|----|---------------|----------------|-------|
| Eastern North America       |       |       |       |      |     |    |    |               |                |       |
| Treeless – Open woodland    | 496   | 0     | 0     | 2    | 1   | 4  | 4  | 12            | 12             | 24    |
| Treeless – Open woodland    | 669   | 0     | 0     | 3    | 0   | 3  | 3  | 13            | 7              | 20    |
| Forest – Open woodland      | 216   | 0     | 0     | 0    | 5   | 5  | 6  | 40            | 18             | 58    |
| Western North America       |       |       |       |      |     |    |    |               |                |       |
| Forest – Open woodland      | 4988  | 1     | 1     | 0    | 3   | 2  | 4  | 18            | 9              | 27    |
| Forest – Open woodland      | 6988  | 1     | 3     | 0    | 3   | 2  | 4  | 29            | 15             | 44    |
| Eastern North Eurasia       |       |       |       |      |     |    |    |               |                |       |
| Treeless – Open woodland    | 1539  | 0     | 1     | 2    | 2   | 5  | 5  | 24            | 11             | 35    |
| Treeless – Open woodland    | 5519  | 1     | 1     | 3    | 0   | 1  | 1  | 27            | 7              | 34    |
| Forest – Open woodland      | 1519  | 0     | 1     | 2    | 2   | 2  | 3  | 13            | 10             | 23    |
| Forest – Open woodland      | 1575  | 0     | 1     | 2    | 3   | 5  | 5  | 12            | 11             | 23    |
| Forest – Open woodland      | 5439  | 1     | 1     | 2    | 3   | 5  | 5  | 11            | 10             | 21    |
| Forest – Open woodland      | 5469  | 1     | 1     | 2    | 4   | 4  | 5  | 11            | 8              | 19    |
| Open woodland – FD Treeless | 1655  | 0     | 1     | 3    | 0   | 1  | 1  | 10            | 58             | 68    |
| Open woodland – FD Treeless | 5519  | 1     | 1     | 3    | 0   | 1  | 1  | 7             | 35             | 35    |
| Open woodland – FD Forest   | 1575  | 0     | 1     | 2    | 3   | 5  | 5  | 11            | 11             | 11    |
| Forest – FD Open woodland   | 1519  | 0     | 1     | 2    | 2   | 2  | 3  | 13            | 11             | 11    |
| Forest – FD Open woodland   | 1575  | 0     | 1     | 2    | 3   | 5  | 5  | 12            | 17             | 17    |
| Vegetation State            |       | 3864x | 1000x | 125x | 25x | 5x | 1x | # Gridcells I | # Gridcells II | Total |
| Western North Eurasia       |       |       |       |      |     |    |    |               |                |       |
| Treeless – Open woodland    | 16532 | 4     | 1     | 0    | 3   | 0  | 1  | 33            | 7              | 40    |
| Forest – Open woodland      | 69    | 0     | 0     | 0    | 2   | 3  | 4  | 11            | 7              | 18    |
| Forest – Open woodland      | 1093  | 0     | 1     | 0    | 3   | 3  | 3  | 12            | 8              | 20    |

**Table S5.** Total amount of gridcells related to alternative classes.

| NA_E Total | NA_W Total | NA Total | NA % | EA_E Total | EA_W Total | EA Total | EA % | Global Total | Global % |
|------------|------------|----------|------|------------|------------|----------|------|--------------|----------|
| 102        | 71         | 173      | 3.55 | 297        | 78         | 375      | 5.06 | 548          | 4.46     |
