# Supplementary material for: Environmental conditions for alternative tree-cover states in high latitudes
Source: Copernicus journal article supplement (doi:10.5194/bg-14-511-2017), 2017-02-02
Supplement: Supplementary file [file bg-14-511-2017-supplement-title-page.pdf › bg-14-511-2017-supplement-title-page.pdf]

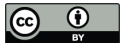

## *Supplement of*

# **Environmental conditions for alternative tree-cover states in high latitudes**

**Beniamino Abis and Victor Brovkin**

*Correspondence to:* Beniamino Abis (beniamino.abis@mpimet.mpg.de)

- bg-14-511-2017-supplement-title-page.pdf
- Abis\_Brovkin\_Supplementary\_Material\_for\_Discussion\_09.01.2017
  - .DS\_Store
  - Analysis
    - \* .DS\_Store
    - \* .ipynb\_checkpoints
    - \* 0\_Dataset\_Filtering\_Boreal\_4\_Regions.ipynb
    - \* 10\_North\_Eurasia\_East\_Classification.ipynb
    - \* 11\_North\_Eurasia\_West\_Russia\_Classification.ipynb
    - \* 12\_Boreal\_Final\_Classification\_4\_Regions\_with\_Plot.ipynb
    - \* 13\_Boreal\_Variability\_Bimodality\_and\_Trimodality.ipynb
    - \* 1\_Dataset\_Plots\_Boreal\_4\_Regions.ipynb
    - \* 2\_GAMs\_1000\_Boreal\_4\_Regions.ipynb
    - \* 3\_Phasespace\_Plots\_East\_Eurasia.ipynb
    - \* 4\_Phasespace\_Plots\_West\_Eurasia.ipynb
    - \* 5\_Phasespace\_Plots\_East\_NorthAmerica.ipynb
    - \* 6\_Phasespace\_Plots\_West\_NorthAmerica.ipynb
    - \* 7\_Bin\_Division\_for\_Classification\_Plot.ipynb
    - \* 8\_North\_America\_East\_New\_Classification.ipynb
    - \* 9\_North\_America\_West\_New\_Classification.ipynb
    - \* canadian\_fire\_manipulation.R
    - \* files\_to\_load\_and\_import
    - \* scripts\_python\_version
  - CRU\_Vs\_NCEP\_MTmin.pdf
  - Data
    - \* Bor\_180\_MOD44B\_V5\_VCFplusVCF\_2001-2010\_0.5deg\_UHAM-ICDC.nc

- \* NA\_East\_Bor\_Ease25\_Northern\_Emisphere\_Mean\_Thawing\_Depth\_1901-2002.nc
- \* NA\_East\_Boreal\_Mean\_GDD0\_1998-2010\_0.5.nc
- \* NA\_East\_bor\_MTmin\_cru\_ts3.22.1998.2010.tmn.dat.nc
- \* NA\_East\_seasonal\_soilw.mon.mean.1998-2010.v2.nc
- \* NA\_East\_shift\_0\_bor\_0.5\_PZI.nc
- \* NA\_East\_shift\_0\_bor\_M6H\_0.5\_tmin.2m.gauss.1998-2010.nc
- \* NA\_East\_shift\_Bor\_MAR\_cru\_ts3.22.1998.2010.pre.dat.nc
- \* NA\_East\_shift\_Bor\_MOD44B\_V5\_VCFplusVCF\_2010\_0.5deg\_UHAM-ICDC.nc
- \* NA\_East\_shift\_Bor\_ReBil\_GloElev\_05.nc
- \* NA\_East\_shift\_bor\_GLC2000\_0.5.nc
- \* NA\_East\_shift\_masked\_bor\_0.5\_Year\_Fire\_Frequency\_1996-2012.nc
- \* NA\_East\_soil\_texture\_0.5.nc
- \* NA\_West\_Bor\_Ease25\_Northern\_Emisphere\_Mean\_Thawing\_Depth\_1901-2002.nc
- \* NA\_West\_Boreal\_Mean\_GDD0\_1998-2010\_0.5.nc
- \* NA\_West\_bor\_MTmin\_cru\_ts3.22.1998.2010.tmn.dat.nc
- \* NA\_West\_seasonal\_soilw.mon.mean.1998-2010.v2.nc
- \* NA\_West\_shift\_0\_bor\_0.5\_PZI.nc
- \* NA\_West\_shift\_0\_bor\_M6H\_0.5\_tmin.2m.gauss.1998-2010.nc
- \* NA\_West\_shift\_Bor\_MAR\_cru\_ts3.22.1998.2010.pre.dat.nc
- \* NA\_West\_shift\_Bor\_MOD44B\_V5\_VCFplusVCF\_2010\_0.5deg\_UHAM-ICDC.nc
- \* NA\_West\_shift\_Bor\_ReBil\_GloElev\_05.nc
- \* NA\_West\_shift\_bor\_GLC2000\_0.5.nc
- \* NA\_West\_shift\_masked\_bor\_0.5\_Year\_Fire\_Frequency\_1996-2012.nc
- \* NA\_West\_soil\_texture\_0.5.nc
- \* NEA\_East\_50\_Bor\_Ease25\_Northern\_Emisphere\_Mean\_Thawing\_Depth\_1901-2002.nc
- \* NEA\_East\_50\_Boreal\_Mean\_GDD0\_1998-2010\_0.5.nc
- \* NEA\_East\_50\_bor\_MTmin\_cru\_ts3.22.1998.2010.tmn.dat.nc
- \* NEA\_East\_50\_seasonal\_soilw.mon.mean.1998-2010.v2.nc
- \* NEA\_East\_50\_shift\_0\_bor\_0.5\_PZI.nc
- \* NEA\_East\_50\_shift\_0\_bor\_M6H\_0.5\_tmin.2m.gauss.1998-2010.nc
- \* NEA\_East\_50\_shift\_Bor\_MAR\_cru\_ts3.22.1998.2010.pre.dat.nc
- \* NEA\_East\_50\_shift\_Bor\_MOD44B\_V5\_VCFplusVCF\_2010\_0.5deg\_UHAM-ICDC.nc
- \* NEA\_East\_50\_shift\_Bor\_ReBil\_GloElev\_05.nc
- \* NEA\_East\_50\_shift\_bor\_GLC2000\_0.5.nc
- \* NEA\_East\_50\_shift\_masked\_bor\_0.5\_Year\_Fire\_Frequency\_1996-2012.nc
- \* NEA\_East\_50\_soil\_texture\_0.5.nc
- \* NEA\_West\_50\_bor\_MTmin\_cru\_ts3.22.1998.2010.tmn.dat.nc
- \* NEA\_West\_Russia\_50\_Bor\_Ease25\_Northern\_Emisphere\_Mean\_Thawing\_Depth\_1901-2002.nc
- \* NEA\_West\_Russia\_50\_Boreal\_Mean\_GDD0\_1998-2010\_0.5.nc
- \* NEA\_West\_Russia\_50\_seasonal\_soilw.mon.mean.1998-2010.v2.nc
- \* NEA\_West\_Russia\_50\_shift\_0\_bor\_0.5\_PZI.nc
- \* NEA\_West\_Russia\_50\_shift\_0\_bor\_M6H\_0.5\_tmin.2m.gauss.1998-2010.nc
- \* NEA\_West\_Russia\_50\_shift\_Bor\_MAR\_cru\_ts3.22.1998.2010.pre.dat.nc
- \* NEA\_West\_Russia\_50\_shift\_Bor\_MOD44B\_V5\_VCFplusVCF\_2010\_0.5deg\_UHAM-ICDC.nc
- \* NEA\_West\_Russia\_50\_shift\_Bor\_ReBil\_GloElev\_05.nc
- \* NEA\_West\_Russia\_50\_shift\_bor\_GLC2000\_0.5.nc
- \* NEA\_West\_Russia\_50\_shift\_masked\_bor\_0.5\_Year\_Fire\_Frequency\_1996-2012.nc

- \* NEA\_West\_Russia\_50\_soil\_texture\_0.5.nc
- \* Terra\_NA\_East\_MODIS\_0.5\_C6\_GSSLAI\_2000\_2015\_Decadal\_Trend\_SigOnly.nc
- \* Terra\_NA\_East\_MODIS\_0.5\_C6\_GSSNDVI\_2000\_2015\_Decadal\_Trend\_SigOnly.nc
- \* Terra\_NA\_West\_MODIS\_0.5\_C6\_GSSLAI\_2000\_2015\_Decadal\_Trend\_SigOnly.nc
- \* Terra\_NA\_West\_MODIS\_0.5\_C6\_GSSNDVI\_2000\_2015\_Decadal\_Trend\_SigOnly.nc
- \* Terra\_NEA\_East\_50\_MODIS\_0.5\_C6\_GSSLAI\_2000\_2015\_Decadal\_Trend\_SigOnly.nc
- \* Terra\_NEA\_East\_50\_MODIS\_0.5\_C6\_GSSNDVI\_2000\_2015\_Decadal\_Trend\_SigOnly.nc
- \* Terra\_NEA\_West\_Russia\_50\_MODIS\_0.5\_C6\_GSSLAI\_2000\_2015\_Decadal\_Trend\_SigOnly.nc
- \* Terra\_NEA\_West\_Russia\_50\_MODIS\_0.5\_C6\_GSSNDVI\_2000\_2015\_Decadal\_Trend\_SigOnly.nc
- GAM\_Comparison
  - \* EA EAST MTmin from CRU
  - \* EA EAST MTmin from NCEP
  - \* EA WEST MTmin from CRU
  - \* EA WEST MTmin from NCEP
  - \* GAM\_Comparison.zip
  - \* NA EAST MTmin from CRU
  - \* NA EAST MTmin from NCEP
  - \* NA WEST MTmin from CRU
  - \* NA WEST MTmin from NCEP
- README.txt
- Supplementary\_Tables.pdf
- Supplementary\_information.pdf

The copyright of individual parts of the supplement might differ from the CC-BY 3.0 licence.
